# Supplementary material
Source: PubMed Central journal article supplement (PMC3547090)

**Multi-directional differentiation of Ascl1-defined progenitors in lung development and injury repair**

Yan Li and Ilona Linnoila

**ONLINE DATA SUPPLEMENT**

### **Supplementary Method: X-Gal Staining**

For X-Gal staining, whole embryos (E10.5-E14.5) or dissected lungs (E12.5-P42) were fixed in 4% paraformaldehyde (PFA) for 1-2 hours at room temperature. After washing in phosphate buffer, the tissues were incubated overnight in X-Gal staining solution (29). Tissues were washed in PBS and post-fixed with 4% PFA overnight at 4°C, dehydrated in 70% ethanol, embedded in paraffin, sectioned at 5µm and stained with Nuclear Fast Red (Vector Laboratories). For cryosectioning, embryos were fixed in 4% PFA for 2 hours at 4°C, rinsed in phosphate buffer, cryoprotected in 30% sucrose, and embedded frozen in OCT (Tissue-Tek) and sectioned at 12µm. Lungs were inflated with 1ml 4% PFA, fixed 1 hour (prenatal), 2 hours (postnatal 1-20 days) and 4 hours (over 3 weeks old) at 4°C before processing for cryosection as above. For paraffin sectioning, lungs were inflated with 1ml 4% PFA, lung lobes were dissected from mice or embryos older than E12.5 and fixed in 4% PFA for 16 hours at 4°C, dehydrated in 70% ethanol and sectioned at 5µm.

**Supplementary Table 1.**

| <b>Antibodies</b>              | <b>Manufacturer</b>                 | <b>Dilution</b> | <b>Specificity</b>                      |
|--------------------------------|-------------------------------------|-----------------|-----------------------------------------|
| <b>Ascl1</b>                   | <b>BD Pharmingen</b>                | <b>1:20</b>     | <b>PNEC, neuron, ganglia</b>            |
| <b>PGP9.5</b>                  | <b>AbD SeroTec</b>                  | <b>1:6000</b>   | <b>PNEC, neuron, ganglia</b>            |
| <b>CGRP</b>                    | <b>Sigma</b>                        | <b>1:3000</b>   | <b>PNEC, neuron</b>                     |
| <b>CC10/UP-1</b>               | <b>DAKO</b>                         | <b>1:1000</b>   | <b>Clara cells</b>                      |
| <b>FoxJ1/HFH4</b>              | <b>abcam</b>                        | <b>1:400</b>    | <b>Ciliated cells</b>                   |
| <b>BTub</b>                    | <b>Gift from Dr. Charles Bevins</b> | <b>1:1000</b>   | <b>Ciliated cells</b>                   |
| <b>pro-SPC</b>                 | <b>Chemicon</b>                     | <b>1:200</b>    | <b>Alveolar type 2 cells</b>            |
| <b><math>\alpha</math>-SMA</b> | <b>abcam</b>                        | <b>1:400</b>    | <b>Smooth muscle cells</b>              |
| <b>TTF-1</b>                   | <b>Leica microsystem</b>            | <b>1:100</b>    | <b>Epithelial cells<br/>(embryonic)</b> |
| <b>P75NTR</b>                  | <b>Promega</b>                      | <b>1:200</b>    | <b>Migrated neuron cells</b>            |
| <b>Aquaporin 5</b>             | <b>Millipore</b>                    | <b>1:1000</b>   | <b>Alveolar type 1 cells</b>            |
| <b>GFP</b>                     | <b>Nacalai tesque</b>               | <b>1:500</b>    | <b>YFP-expressing cells</b>             |
|                                |                                     |                 |                                         |

**Supplementary Figure 1. Photomicrographs of PNEC and epithelial cell differentiation during development.**

(A-C) PNEC markers in E12.5 embryonic lung. (A) *Ascl1* is expressed in solitary PNECs along the proximal airway lining (arrow) and in an adjacent ganglion (arrow head). (B) PGP9.5 is expressed in all the airway epithelial cells (arrow) and ganglia (arrow head). (C) No CGRP is detected. (D-I) Differentiation in E14.5 embryonic lung. (D-E) NEBs start to form in the proximal airways. (D) *Ascl1* is expressed in both NEBs (arrow heads) and solitary PNECs (arrows). (E) PGP9.5 is expressed in all airway epithelial cells and more intensely in the NEBs (arrow head). (F-H) No CGRP positive PNECs, Clara, or ciliated cells are present. (I) SPC is expressed in all the epithelial cells. (J-O) Cell differentiation in E17.5 embryonic lung. (J-L) NE markers *Ascl1*, PGP9.5 and CGRP in NEBs (arrows). (M-O) Epithelial cells are differentiated into Clara cells (M), ciliated cells (N), and alveolar type 2 cells (O) (immunoperoxidase stain; \* = airway lumen; bar = 50  $\mu$ m for A-C; bar = 25  $\mu$ m for D-O).

**Supplementary Figure 2.** (A-B) Photomicrographs of emerging ciliated and smooth muscle cells in embryonic lungs. (A) FoxJ1 in proximal airways of E14.5 lung. The immunoreactivity is nuclear (immunoperoxidase stain; bar = 20  $\mu$ m). (B) Co-localization of ASDCs by X-Gal staining (blue) with brown FoxJ1 immunoreactive signal (arrows; bar = 20  $\mu$ m). (C) Co-localization of ASDCs by X-Gal staining (blue) with  $\alpha$ -SMA immunoreactivity (arrows) in vascular smooth muscle at E12.5 (arrows; bar = 20  $\mu$ m).

**Supplementary Figure 3. Co-localization of lacZ labeling with differentiation markers in naphthalene injury repair.** (A) Airway epithelium from control tamoxifen-induced *Ascl1*-CreERTM;R26-lacZ mouse 5 days after i.p. injection of corn oil (N0). Most cells are positive for CC10 (left panel). Insets illustrate corresponding areas of epithelium in adjacent sections positive for  $\beta$ -tubulin (1) or CGRP (2) (right panels). Note co-localization of blue labeling in cells with brown immunoreactivity (arrows). (B) Airway epithelium from tamoxifen-induced *Ascl1*-CreERTM;R26-lacZ mouse 5 days after i.p. injection of naphthalene (N5). Groups of CC10 positive cells (left panel). Insets illustrate corresponding areas of epithelium in adjacent sections positive for  $\beta$ -tubulin (1) or CGRP (2) (right panels). Note co-localization of blue labeling in cells with brown immunoreactivity (arrows). bar= 50  $\mu$ m in B and C; bar= 20  $\mu$ m in (1) and (2). (C) Bar graph of ASDC quantification. Percentage of Clara (blue bar), ciliated (red bar) cells or PNECs (black bar) that are also X-Gal positive (ASDCs). N0 = oil-treated control; N5= five days post-naphthalene. A total of 1000 CC10 and BTub positive cells, and 30-45 NEBs (200-350 PNECs) were counted per animal (n=3).

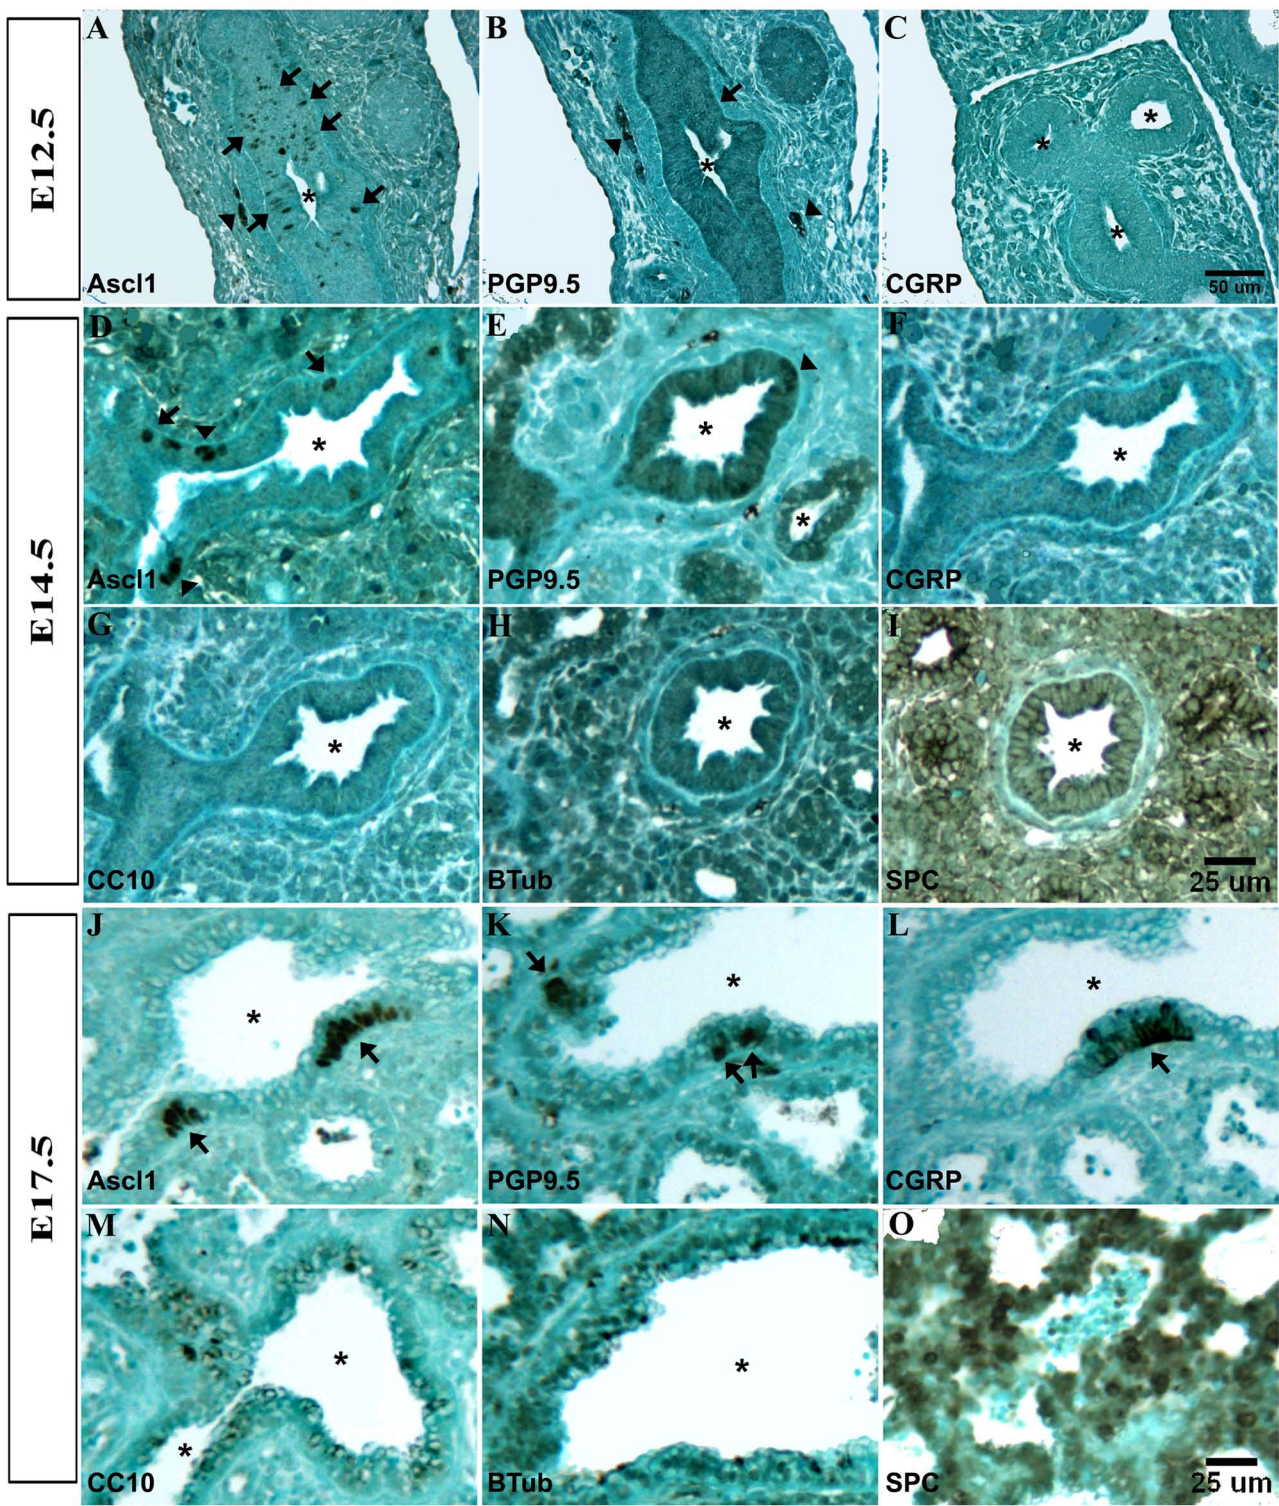

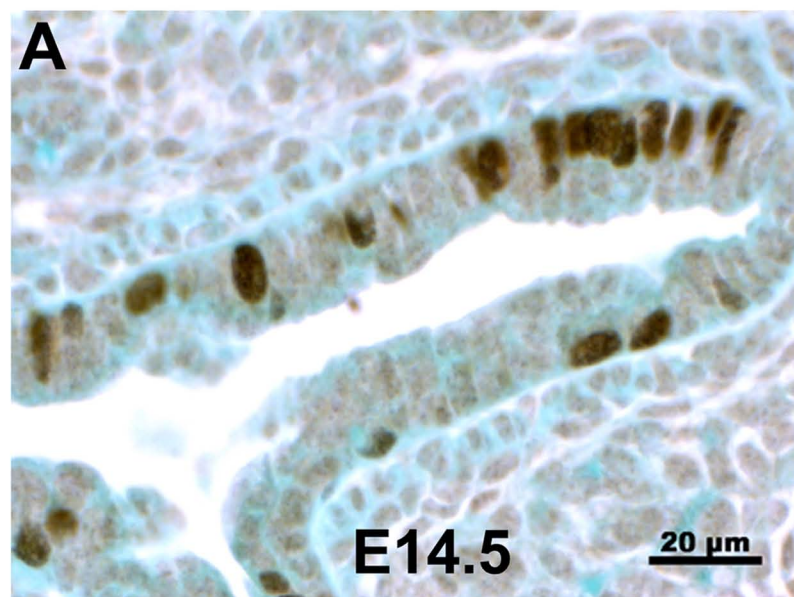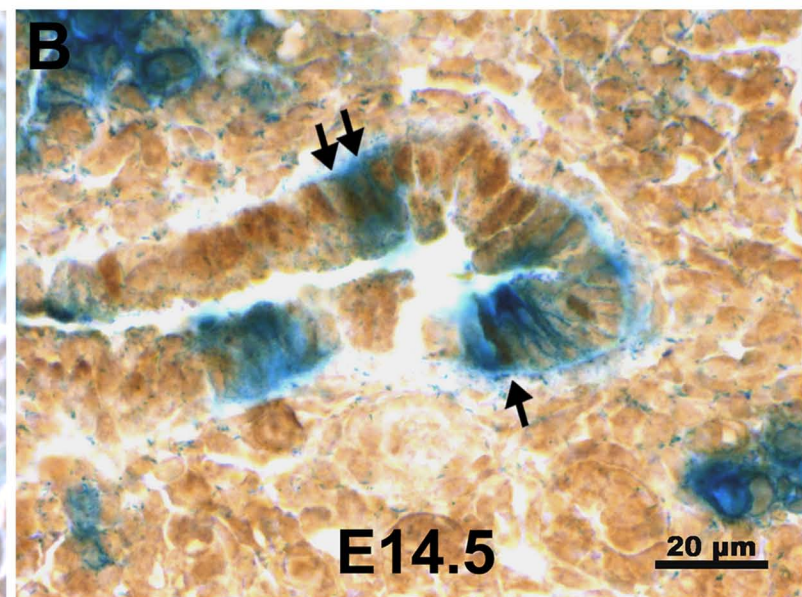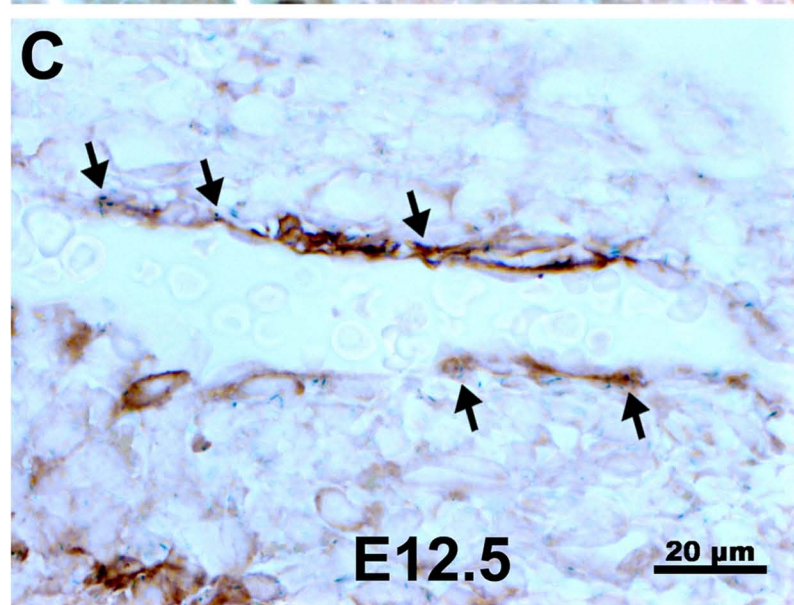

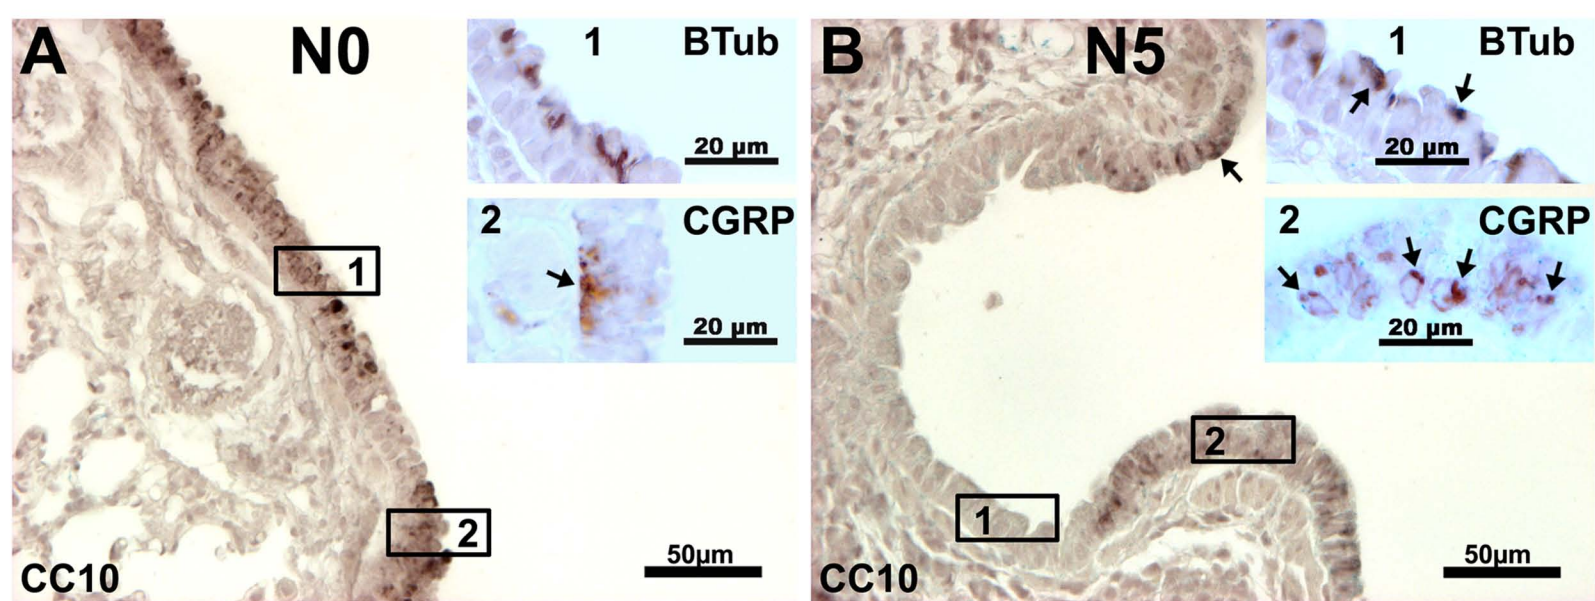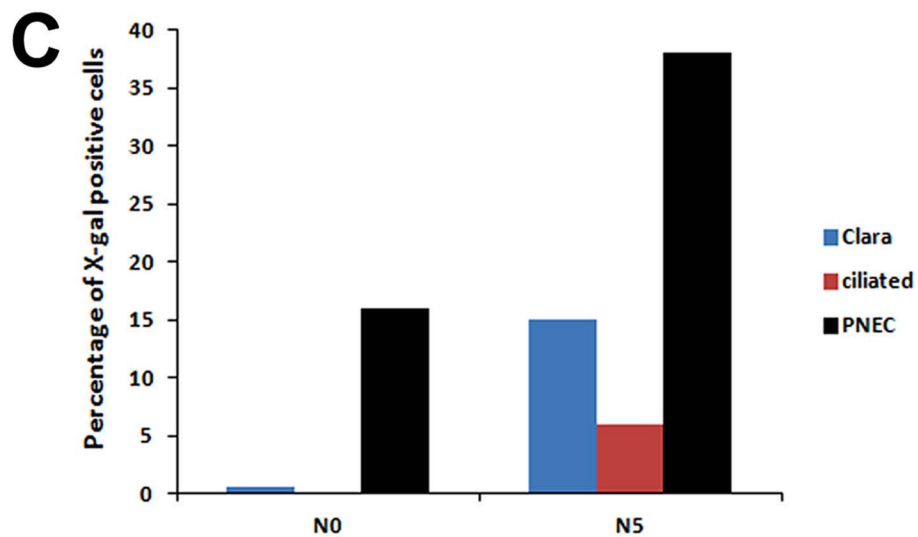

Supplement: supp_47.6.768_Li_ODS.pdf [file supp_47.6.768_Li_ODS.pdf]
